# Supplementary material for: Integrative Dissection of Novel Lactate Metabolism-Related Signature in the Tumor Immune Microenvironment and Prognostic Prediction in Breast Cancer
Source: PubMed Central journal article supplement (PMC9094627; doi:10.3389/fonc.2022.874731), 2022-04-27

## *Supplementary Material*

### **SUPPLEMENTARY FIGURE LEGEND**

**Supplementary Figure 1:** Identification of 205 reliable lactate metabolism-related genes. (A) Venn diagram to identify 205 overlapping LMGs in TCGA-BRCA, METABRIC and GSE96058 datasets. (B) The information of 205 eligible LMGs.

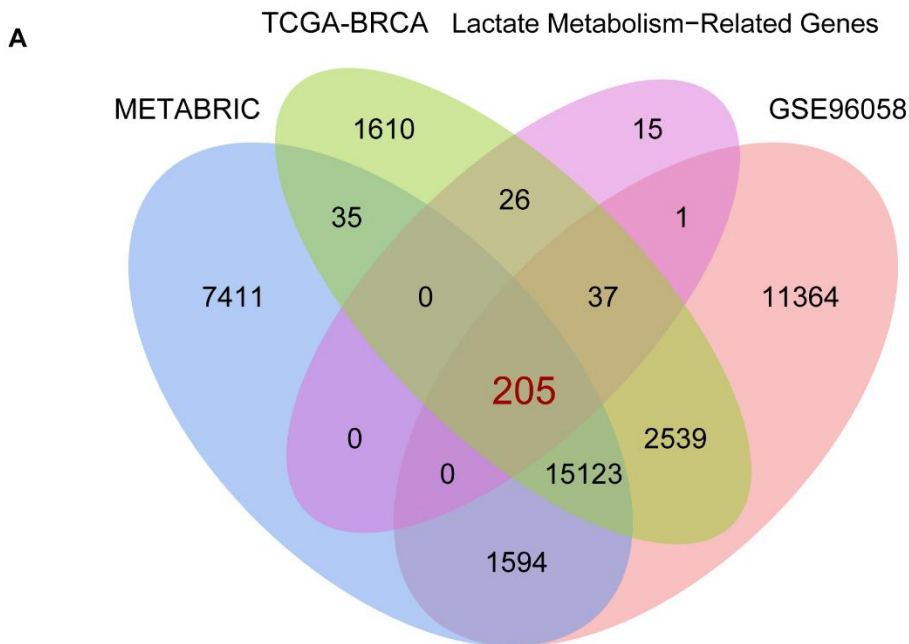

**B**

**Supplement Table1. The information of 205 lactate metabolism-related genes**

|    |          |          |          |         |          |         |          |          |
|----|----------|----------|----------|---------|----------|---------|----------|----------|
| 1  | COQ9     | NDUFS4   | PDP1     | MVK     | NDUFA12  | WARS2   | SLC13A3  | LYRM7    |
| 2  | FBXL4    | SDHA     | AIFM1    | LDHA    | PYGL     | SIL1    | PC       | FKRP     |
| 3  | RARS2    | SPP1     | GYS2     | PITRM1  | SCO1     | RNASEH1 | CLPB     | ACAT1    |
| 4  | KY       | AARS2    | SLC5A12  | NDUFAF2 | TCIRG1   | HTRA2   | SLC16A8  | B3GALNT2 |
| 5  | TIMM22   | LIPT1    | MYC      | NDUFV2  | CHEK2    | PHKG2   | SLC16A7  | ALDH4A1  |
| 6  | MRPL3    | CYP27A1  | CA5A     | BCS1L   | INPP5K   | CD46    | PNPLA8   | DLD      |
| 7  | PNPT1    | COX8A    | POMT1    | NDUFB8  | JAK2     | TK2     | MECP2    | YARS2    |
| 8  | NDUFS2   | SLC25A13 | PLEC     | LDHC    | TMEM126B | NDUFA9  | COX4I1   | PLA2G6   |
| 9  | MRPS28   | RHCE     | SLC25A42 | LIAS    | TMEM70   | NDUFV1  | NFS1     | SLC25A10 |
| 10 | SLC16A1  | MRPS34   | NDUFS8   | MRPL44  | NDUFA10  | SOD1    | PDHX     | NARS2    |
| 11 | UQCRC2   | SDHB     | NDUFA4   | HMGCL   | PNPO     | OGDH    | NDUFA8   | RB1      |
| 12 | MPV17    | COL4A1   | DNM1L    | LDHD    | MRPS14   | CFH     | GFM1     | LIPA     |
| 13 | RPS14    | PNPLA2   | POLG     | GATA1   | C1QBP    | NDUFAF1 | TUFM     | ISCA1    |
| 14 | FARS2    | NDUFB3   | COX16    | EMB     | SLC25A4  | LDHAL6B | MTO1     | HBB      |
| 15 | SFXN4    | MRPL12   | CARS2    | RHAG    | COX6B1   | PIGA    | SURF1    | NGLY1    |
| 16 | SLC25A19 | ADAMTS1  | SLC19A1  | DAG1    | MIPEP    | CHCHD10 | CYC1     | VPS13A   |
| 17 | TET2     | SLC16A3  | COX6A2   | ECHS1   | NDUFA13  | UQCRCQ  | TSFM     | NDUFS3   |
| 18 | RMND1    | POLG2    | RHD      | EARS2   | LRPPRC   | CPT2    | RRM2B    | LDHB     |
| 19 | FASTKD2  | MDH2     | NDUFB11  | SLC39A8 | TP53     | TXN2    | NDUFAF3  | MTFMT    |
| 20 | LYST     | ACAD9    | TACO1    | PDSS2   | IRAK1    | LONP1   | GOT2     | TARS2    |
| 21 | SLC7A7   | COX5A    | GTPBP3   | SUCLG1  | GFM2     | SERAC1  | HLA-DRB1 | LIPT2    |
| 22 | HSD17B10 | NDUFAF4  | OCRL     | PDSS1   | NDUFA1   | PMPCB   | TRMT5    | HS6ST2   |
| 23 | NDUFC2   | CFI      | SLC25A3  | DGUOK   | COX10    | ISCU    | FOXRED1  | FLI1     |
| 24 | COG8     | ACADM    | STAT4    | PUS1    | UQCRB    | POMGNT1 | ATAD3A   | NDUFB10  |
| 25 | SYNJ1    | ATPAF2   | PDHA1    | GAA     | SLC25A26 | NDUFA11 | CALR     | MRPS22   |
| 26 | ACAT2    | POMT2    | KCNN4    | NDUFS7  | COQ2     |         |          |          |

**Supplementary Figure 2.** Expression level of SLC19A1 and RPS14 in human breast cancer cell lines. (A) Expression level of SLC19A1. (B) Expression level of RPS14.

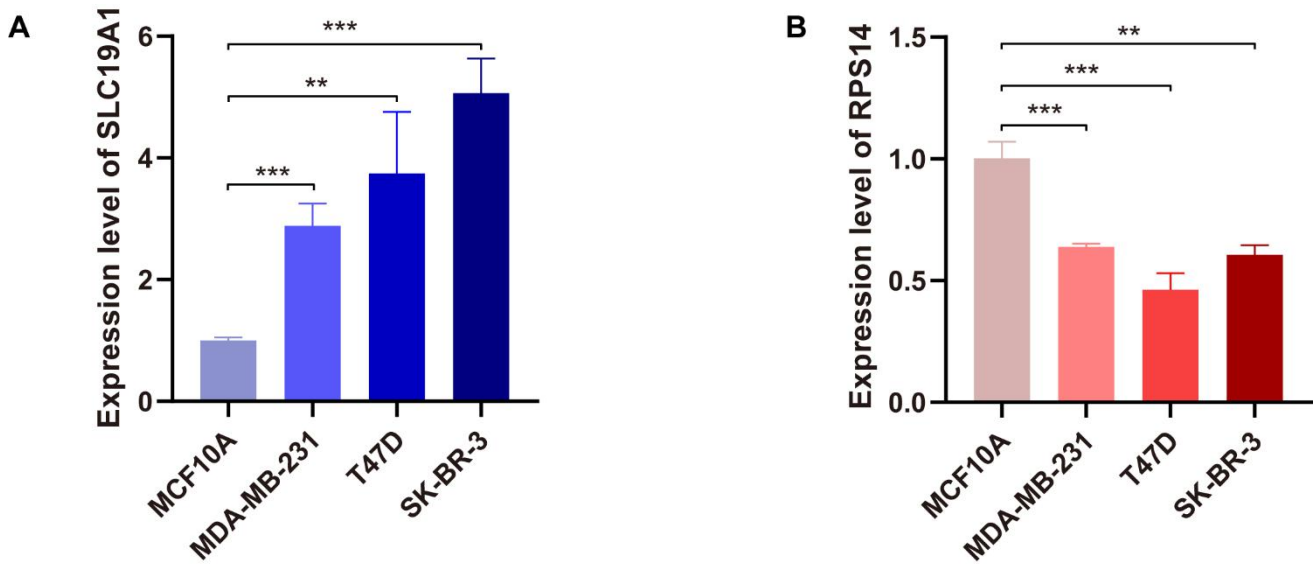

**Supplementary Figure 3.** ROC analysis of LMI signature in different subtypes in TCGA-BRCA. (A) Result of Basal subtype. (B) Result of non-Basal subtype.

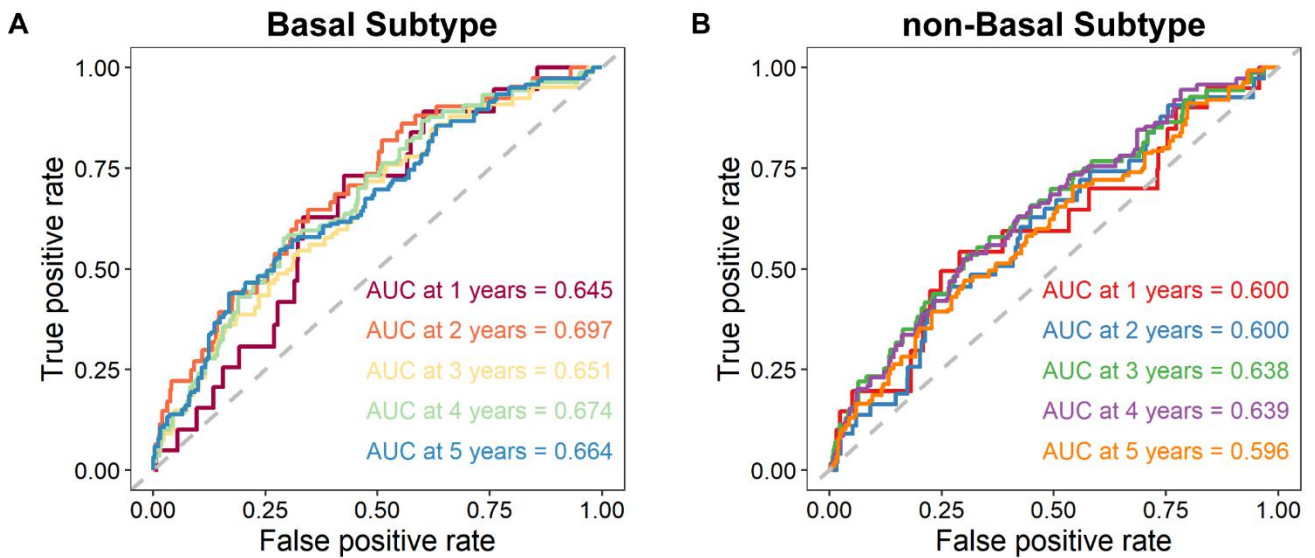

Supplement: DataSheet_1.pdf [file DataSheet_1.pdf]
